# Supplementary material
Source: Springer Nature journal article supplement (https://www.springermedizin.de/resource/supplementary/12889_2006_472_MOESM3_ESM.pdf/9500946)

**Control  
Rayons**

Baseline survey  
(n=11)  
(12/2003)

Record review, focus  
group discussions  
(5/2004)

Follow-up  
survey (n=10)  
(4/2005)

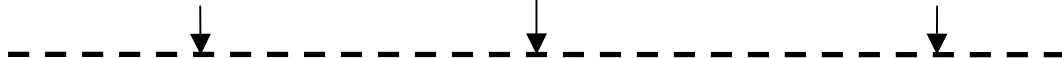

*VPD  
guidelines  
training /  
Start of QA  
monitoring  
(8/2003)*

*Job aid and  
VPD  
guidelines  
introduced  
(9/2003)*

*Training in  
sample  
collection,  
transport & bio-  
safety  
(2/2004)*

*Two  
workshops to  
discuss  
monitoring  
results  
(3-4/2004)*

*Revised job aid  
(workbook)  
introduced  
(10/2004)*

**Interventio  
n Rayons  
(Imeriti)**

Baseline survey  
(n=31)  
(8/2003)

*Rabies  
training  
(3/2004)*

Record review, focus  
group discussions  
(5/2004)

Follow-up survey  
(n = 35), record  
review, focus group  
discussions (4/2005)

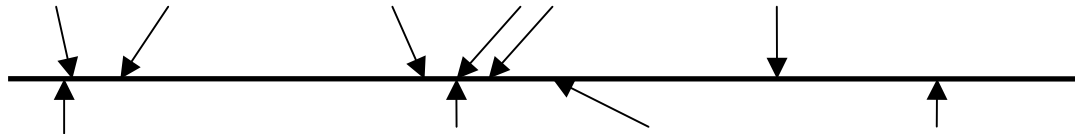

Supplement: MOESM3 [file 9500946]
